# Supplementary material for: Does implicit motor learning lead to greater automatization of motor skills compared to explicit motor learning? A systematic review
Source: PubMed Central journal article supplement (PMC6124806; doi:10.1371/journal.pone.0203591), 2018-09-05
Supplement: pone.0203591.s003.pdf [file pone.0203591.s003.pdf]

**S1 Table. Cochrane Risk of Bias Tool**

| <i>Domain of bias</i>       | <i>Qualification</i> | <i>Criteria for assigning risk of bias</i>                                                                                                                                                                                                          |
|-----------------------------|----------------------|-----------------------------------------------------------------------------------------------------------------------------------------------------------------------------------------------------------------------------------------------------|
| <i>Selection bias</i>       |                      | <i>Sequence generation</i>                                                                                                                                                                                                                          |
|                             | +                    | Computer based random number generators, a table with random numbers or similar methods                                                                                                                                                             |
|                             | -                    | Quasi randomization procedures e.g. allocation based on date of birth or on day of the week                                                                                                                                                         |
|                             | ?                    | None described sequence generation                                                                                                                                                                                                                  |
| <i>Selection bias</i>       |                      | <i>Allocation concealment</i>                                                                                                                                                                                                                       |
|                             | +                    | Person(s) responsible for randomization should be independent and blinded to participant at randomization                                                                                                                                           |
|                             | -                    | Person(s) responsible for randomization should are not independent or blinded to participant at randomization                                                                                                                                       |
|                             | ?                    | None described allocation concealment                                                                                                                                                                                                               |
| <i>Performance bias (1)</i> |                      | <i>Blinding of participants and personnel</i>                                                                                                                                                                                                       |
|                             | +                    | Blinded participants and personnel;<br><i>It is stated that participants were not specifically informed about the nature of the intervention<br/>Personnel that provided intervention was not informed about nature of the intervention</i>         |
|                             | -                    | Non blinded participants and personnel;<br><i>It is not stated that participants were not specifically informed about the nature of the intervention<br/>Personnel that provided intervention was not informed about nature of the intervention</i> |
|                             | ?                    | None described or unclear blinding of participants and personnel                                                                                                                                                                                    |
| <i>Performance bias (2)</i> |                      | <i>Manipulation check of degree to which motor learning had been implicit/explicit</i>                                                                                                                                                              |
|                             | +                    | Implicit group demonstrated significantly less movement-related knowledge than explicit group after learning                                                                                                                                        |
|                             | -                    | No clear differences in movement-related knowledge between implicit and explicit groups                                                                                                                                                             |
|                             | ?                    | No manipulation checks described/reported                                                                                                                                                                                                           |
| <i>Detection bias</i>       |                      | <i>Blinding of outcome assessment</i>                                                                                                                                                                                                               |
|                             | +                    | Blinded outcome assessor                                                                                                                                                                                                                            |
|                             | -                    | Non blinded outcome assessment                                                                                                                                                                                                                      |
|                             | ?                    | Methods of (blinding) the outcome assessment were not described                                                                                                                                                                                     |
| <i>Attrition bias</i>       |                      | <i>Incomplete outcome data</i>                                                                                                                                                                                                                      |
|                             | +                    | Random lost to follow up of participants was present when $\leq 10\%$ was lost to follow up                                                                                                                                                         |
|                             | -                    | Selective lost to follow up of participants was present when $> 10\%$ was lost to follow up                                                                                                                                                         |
|                             | ?                    | Unclear lost to follow up                                                                                                                                                                                                                           |
| <i>Reporting bias</i>       |                      | <i>Selective reporting</i> (www.controlled-trials.com, ClinicalTrials.gov, <a href="http://apps.who.int/trialsearch/">http://apps.who.int/trialsearch/</a> were searched for protocols)                                                             |
|                             | +                    | Articles that reported all a priori described outcomes                                                                                                                                                                                              |
|                             | -                    | Articles that did not report all a priori described outcomes                                                                                                                                                                                        |
|                             | ?                    | The protocol was not found.                                                                                                                                                                                                                         |
| <i>Other biases</i>         |                      |                                                                                                                                                                                                                                                     |
|                             | +                    | No other systematic errors were present                                                                                                                                                                                                             |
|                             | -                    | Any other systematic errors that could lead to bias (e.g., baseline differences between groups in motor skill, or other possibly relevant factors)                                                                                                  |
